# Supplementary material
Source: PubMed Central journal article supplement (PMC6858565)
Supplement: NIHMS1539058-supplement-Source_data_ext_fig_1.pdf [file NIHMS1539058-supplement-Source_data_ext_fig_1.pdf]

Extended Data Figure 1c

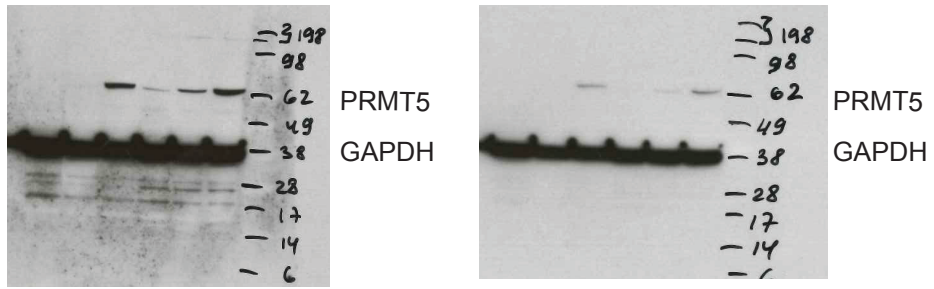

Inverse sample order  
1 min exposure

Inverse sample order  
1 sec exposure

Extended Data Figure 1d

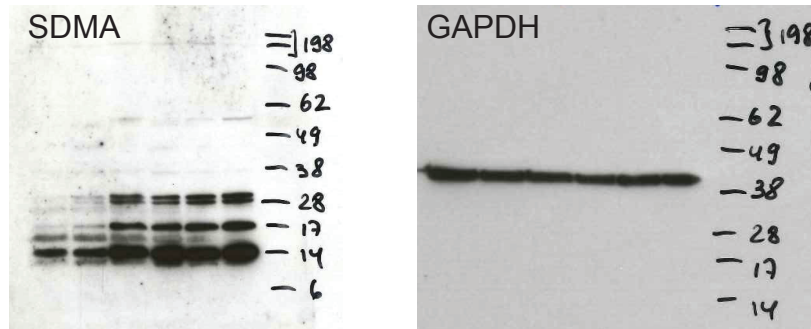

Inverse sample order

Inverse sample order
