# Supplementary material
Source: PubMed Central journal article supplement (PMC6858565)

Extended Data Figure 2a

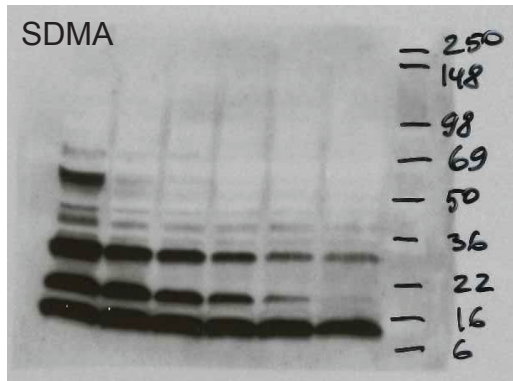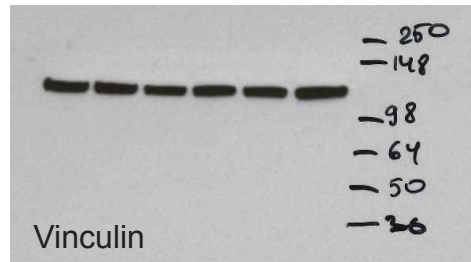

Supplement: NIHMS1539058-supplement-Source_data_ext_fig_2.pdf [file NIHMS1539058-supplement-Source_data_ext_fig_2.pdf]

Extended Data Figure 6a

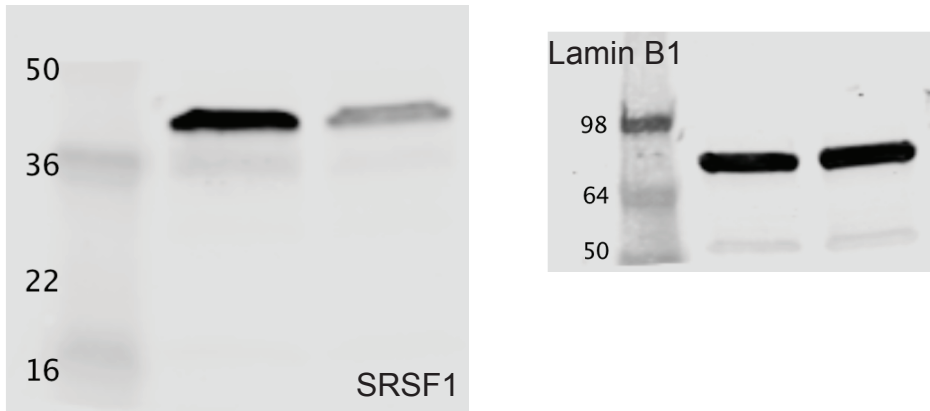

Extended Data Figure 6b

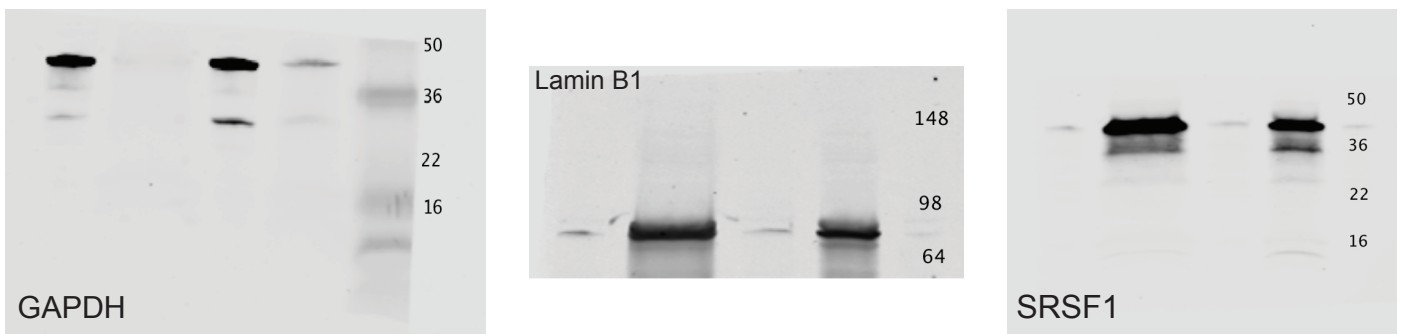

Supplement: NIHMS1539058-supplement-Source_data_ext_fig_6.pdf [file NIHMS1539058-supplement-Source_data_ext_fig_6.pdf]

Extended Data Figure 7b

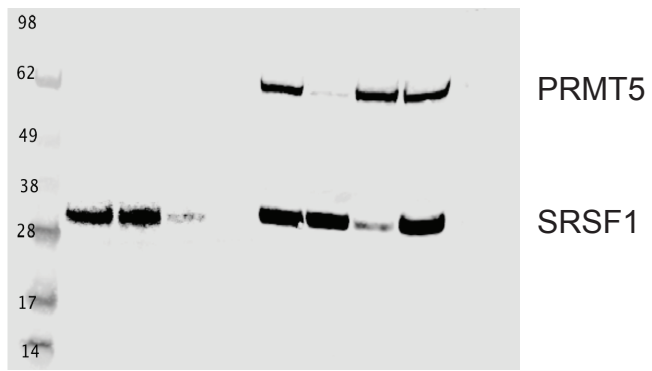

Supplement: NIHMS1539058-supplement-Source_data_ext_fig_7.pdf [file NIHMS1539058-supplement-Source_data_ext_fig_7.pdf]
